# Supplementary material for: Autoantigen profiling reveals a shared post-COVID signature in fully recovered and long COVID patients
Source: PubMed Central journal article supplement (PMC10393220; doi:10.1172/jci.insight.169515), 2023-06-08
Supplement: jciinsight-8-169515-s100.pdf [file jciinsight-8-169515-s100.pdf]

|                                                      | Long COVID<br>(LC)<br>n=121 | Convalescent COVID<br>(No LC)<br>n=64 | Total<br>n=185   |
|------------------------------------------------------|-----------------------------|---------------------------------------|------------------|
| Days post-symptom onset                              | 121 (107 to 129)            | 121 (108 to 128)                      | 121 (108 to 129) |
| Number of COVID-attributed symptoms at time of visit | 4 (2 to 8)                  | 0 (0 to 0)                            | 2 (0 to 6)       |
| Age in years                                         | 46 (38 to 55)               | 48 (38 to 58)                         | 48 (38 to 56)    |
| Female birth sex, n (%)                              | 57 (47.1)                   | 24 (37.5)                             | 81 (43.8)        |
| Race/ethnicity, n (%)                                |                             |                                       |                  |
| Hispanic/Latino                                      | 44 (37.0)                   | 12 (19.4)                             | 56 (30.9)        |
| White                                                | 61 (51.3)                   | 34 (54.8)                             | 95 (52.5)        |
| Black/African American                               | 6 (5.0)                     | 4 (6.5)                               | 10 (5.5)         |
| Asian                                                | 7 (5.9)                     | 9 (14.5)                              | 16 (8.8)         |
| Pacific Islander/Native Hawaiian                     | 1 (0.8)                     | 3 (4.8)                               | 4 (2.2)          |
| Hospitalized during COVID-19 illness, n (%)          | 30 (24.8)                   | 13 (20.3)                             | 43 (23.2)        |
| Medical Comorbidities, n (%)                         |                             |                                       |                  |
| Autoimmune disease                                   | 9 (7.4)                     | 1 (1.6)                               | 10 (5.4)         |
| Cancer treated within past 2 years                   | 4 (3.3)                     | 1 (1.6)                               | 5 (2.7)          |
| Diabetes                                             | 11 (9.4)                    | 8 (12.5)                              | 19 (10.5)        |
| HIV                                                  | 31 (25.6)                   | 8 (12.5)                              | 39 (21.1)        |
| Heart attack or heart failure                        | 3 (2.5)                     | 2 (3.1)                               | 5 (2.7)          |
| Hypertension                                         | 30 (25.0)                   | 6 (9.4)                               | 36 (19.6)        |
| Lung disease                                         | 18 (15.0)                   | 13 (20.3)                             | 31 (16.8)        |
| Kidney disease                                       | 1 (0.8)                     | 1 (1.6)                               | 2 (1.1)          |
| History of tobacco smoking, n (%)                    | 37 (32.2)                   | 15 (26.8)                             | 52 (30.4)        |
| Long COVID group*, n (%)                             |                             | -                                     | -                |
| Any Long COVID                                       | 121 (100)                   | -                                     | -                |
| Severe (5 or more symptoms)                          | 75 (62.0)                   | -                                     | -                |
| Cardiopulmonary phenotype                            | 70 (57.9)                   | -                                     | -                |
| Upper respiratory phenotype                          | 26 (21.5)                   | -                                     | -                |
| Gastrointestinal phenotype                           | 42 (34.7)                   | -                                     | -                |
| Musculoskeletal phenotype                            | 44 (36.4)                   | -                                     | -                |
| Neurologic phenotype                                 | 100 (82.6)                  | -                                     | -                |
| Central neurologic (CNS) phenotype                   | 90 (74.4)                   | -                                     | -                |
| Shortness of breath                                  | 44 (36.4)                   | -                                     | -                |
| Headache                                             | 33 (27.3)                   | -                                     | -                |
| Anosmia                                              | 30 (24.8)                   | -                                     | -                |
| Issues with memory/concentration                     | 63 (52.1)                   | -                                     | -                |
| Fatigue                                              | 59 (48.8)                   | -                                     | -                |
| Quality of life (low)                                | 49 (40.5)                   | -                                     | -                |
| Depression (moderate or worse)                       | 26 (21.5)                   | -                                     | -                |
| Anxiety (moderate or worse)                          | 21 (17.4)                   | -                                     | -                |
| EBV early antigen-D (EA-D) positive                  | 66 (54.5)                   | -                                     | -                |
| EBNA high response                                   | 77 (63.6)                   | -                                     | -                |

**Supplemental Table 1. Participant characteristics.** All values are median (IQR) unless otherwise noted. \*Long COVID phenotypes are not mutually exclusive and include the following: cardiopulmonary (cough, shortness of breath, chest pain, palpitations, fainting), upper respiratory (runny nose, sore throat), gastrointestinal (diarrhea, constipation, nausea, vomiting, loss of appetite, abdominal pain), musculoskeletal (back pain, muscle pain, pain in the arms, legs, or joints), any neurologic symptom (problems with vision, headache, difficulty with concentration or memory, dizziness, difficulty with balance, trouble with smell or taste, phantosmia, paresthesia), CNS-specific (problems with vision, headache, difficulty with concentration or memory, dizziness, difficulty with balance). Counts for common Long COVID symptoms (in which >25 individuals reported the symptom) are shown for shortness of breath, headache, anosmia, and issues with memory/concentration. Quality of life refers to those with lowest quality-of-life score on a visual analogue scale. Depression counted if the individual scored >10 on PHQ-8. Anxiety counted if the individual scored >9 on GAD-7. As per *Peluso et al J Clin Invest* 2023, EBV early antigen-D positive indicates detectable value above indeterminate range (> 9 U/mL) and EBNA high response indicates responses >600 U/mL on the corresponding assay.

**A** Autoantigen Distribution by HIV status

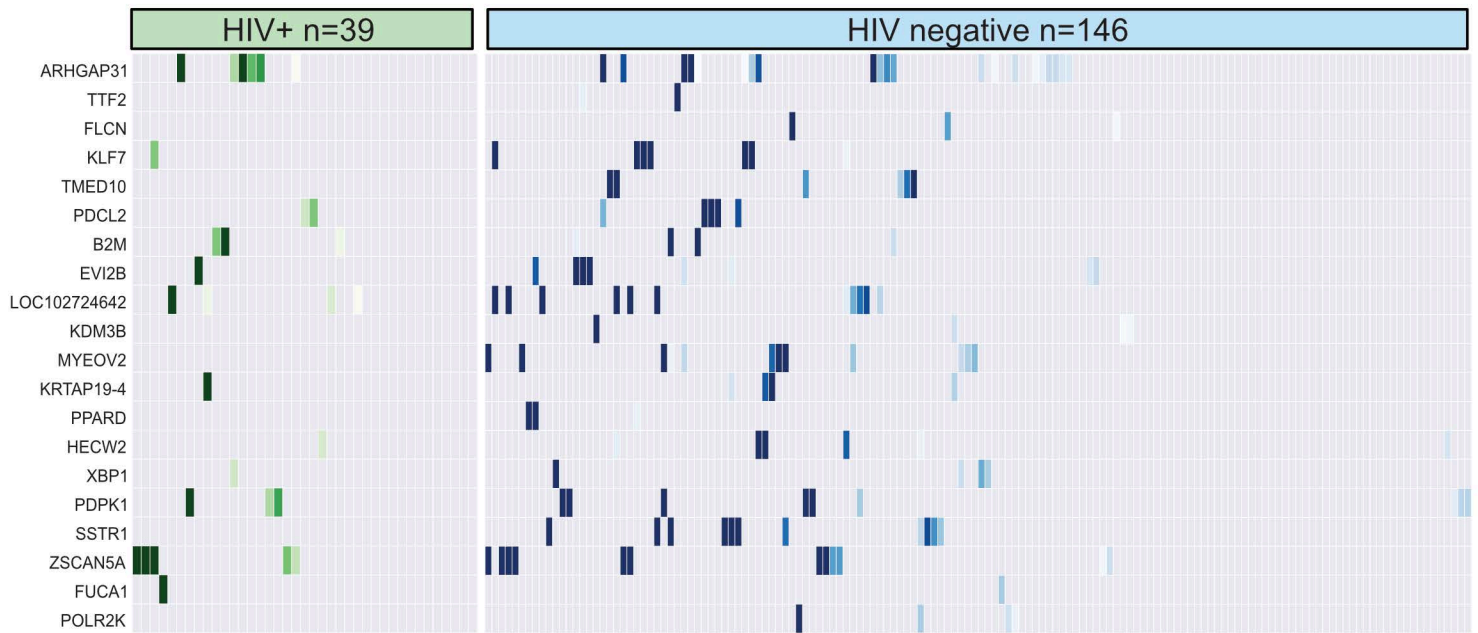

**B** Autoantigen Distribution by Gender

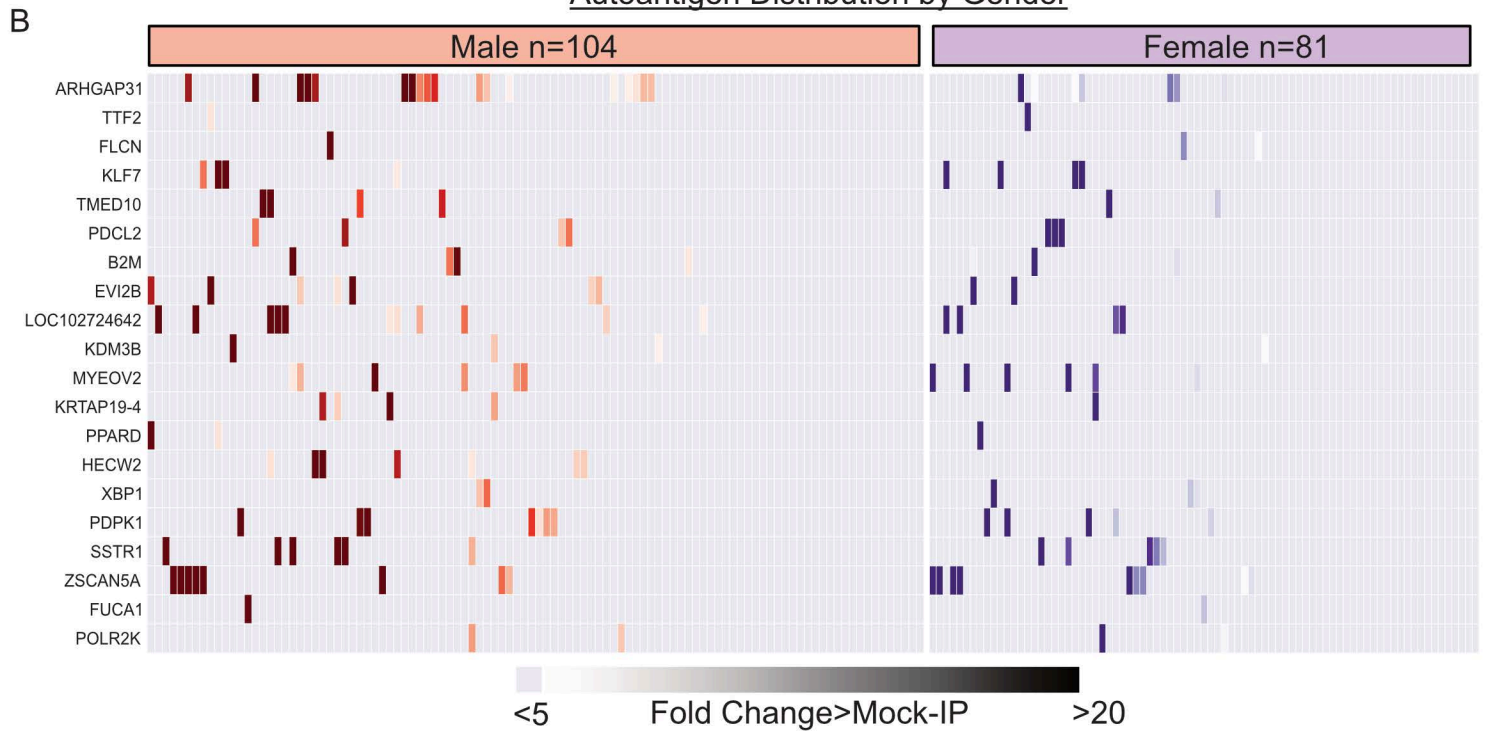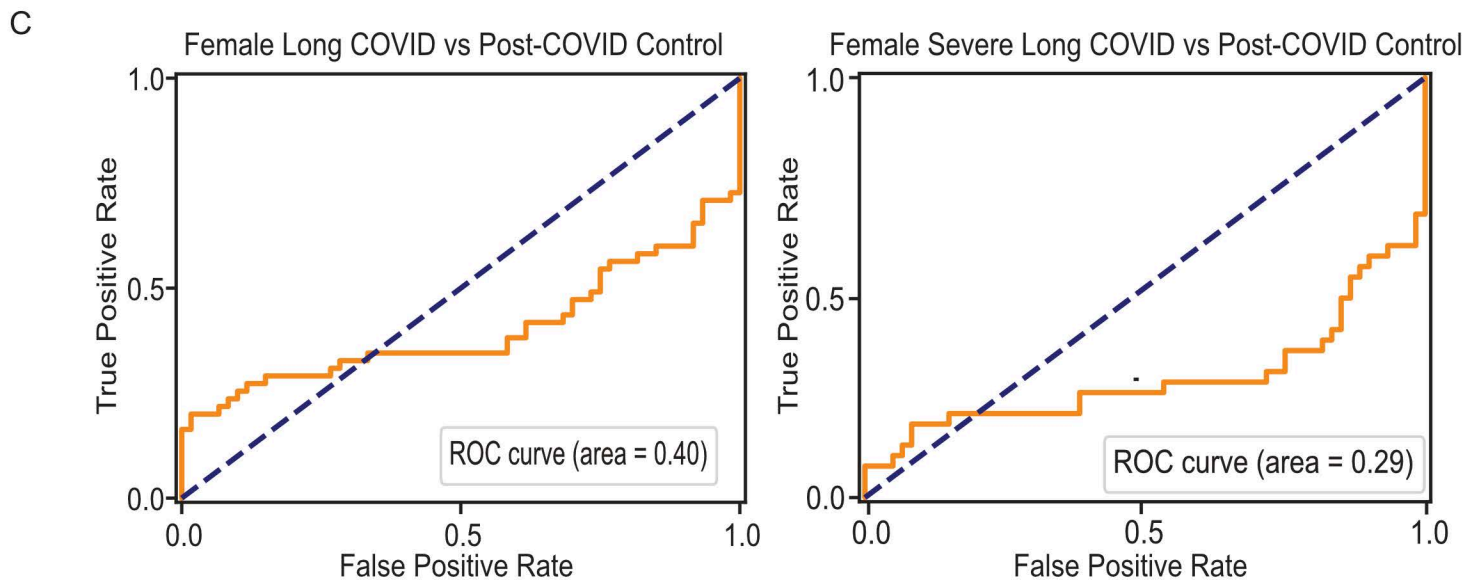

**Supplemental Figure 1: Distribution of post-COVID autoantigens by HIV status and gender.**

Hierarchically clustered (Pearson) heatmaps showing the PhIP-Seq enrichment for the top 20 autoreactivities ranked by logistic regression coefficient by HIV status (A; HIV positive n=39, HIV negative n=146) and gender (B; Male n=104, Female n=81). (C) Logistic regression receiver operating characteristic (ROC) curves for female Long COVID patients and female severe Long COVID patients relative to Post-COVID convalescent controls.

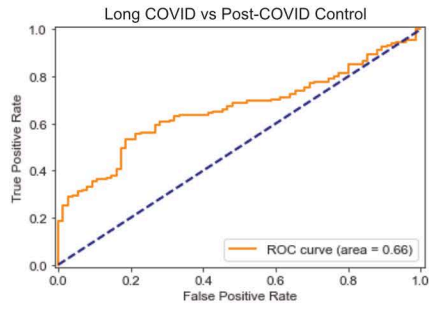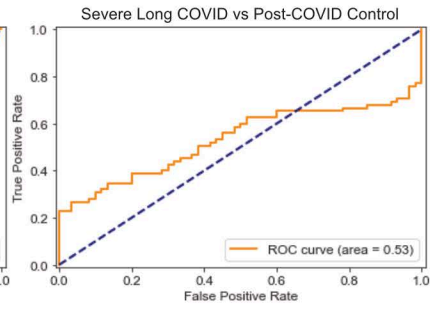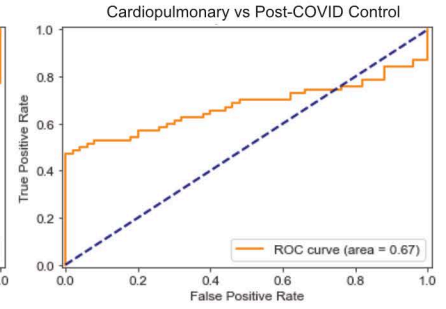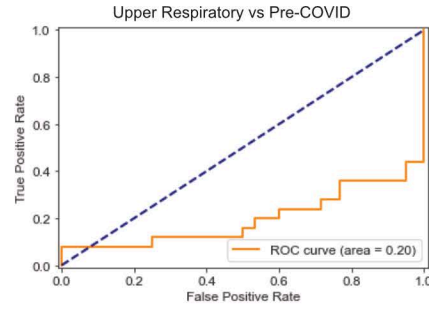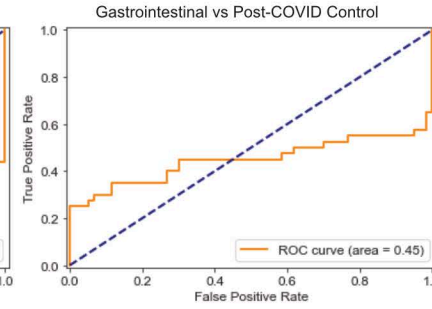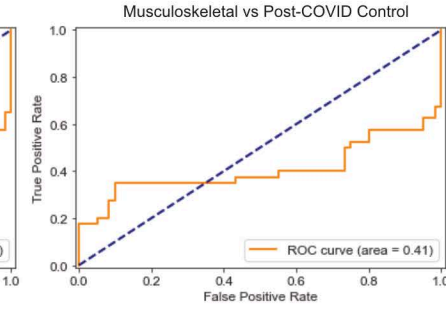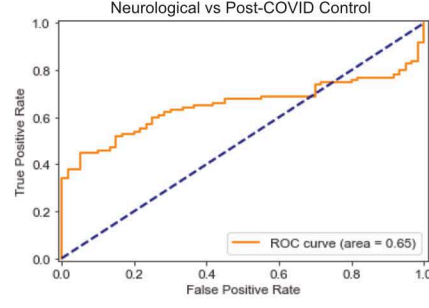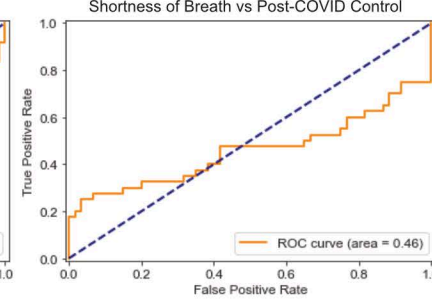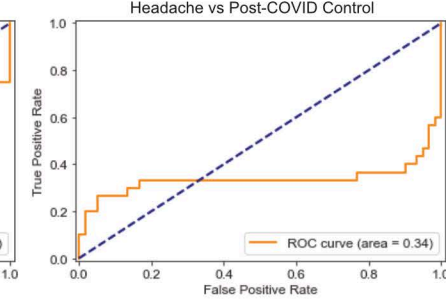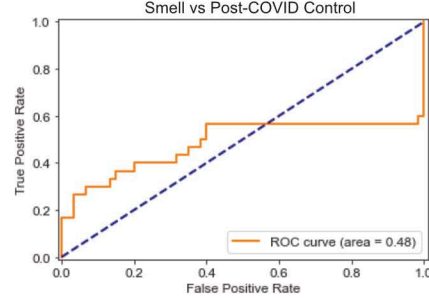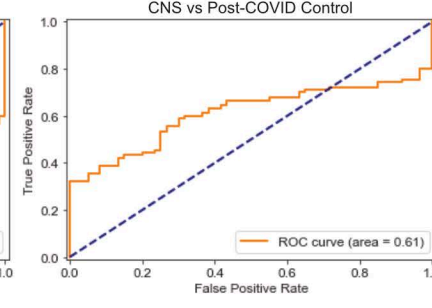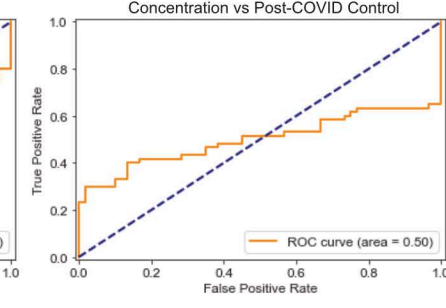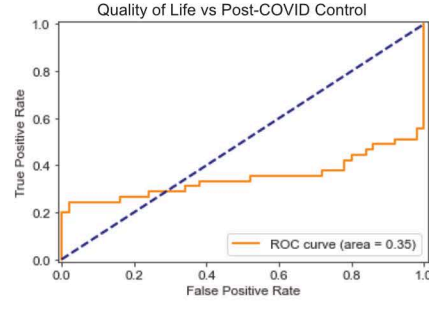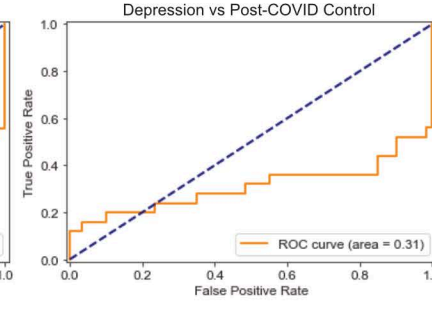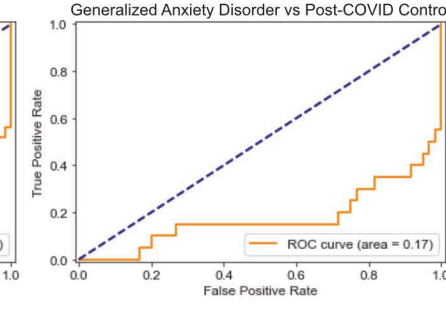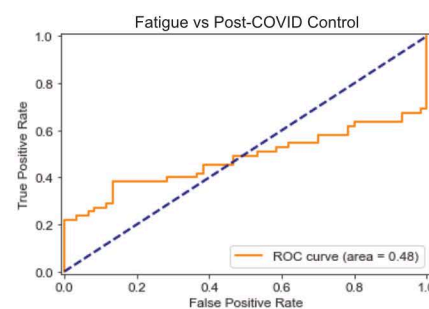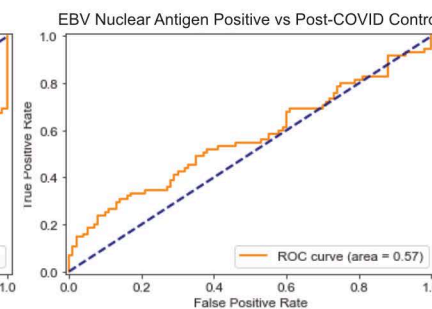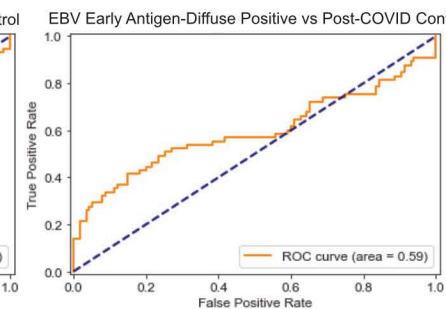

**Supplemental Figure 2: PhIP-Seq is unable to distinguish Long COVID symptom phenotypes from controls.** Logistic regression receiver operating characteristic (ROC) curves for Long COVID patients with different specified symptom phenotypes relative to patients previously infected with COVID without the phenotype. Control refers to post-COVID comparator without the specific disease phenotype indicated in the panel.
